# Supplementary material
Source: Elsevier journal article supplement (https://comptes-rendus.academie-sciences.fr/geoscience/article/10.1016/j.crte.2010.11.004/file/attach/mmc1.pdf)
Supplement: mmc1 [file mmc1.pdf]

## List of tables

### Liste des tableaux

---

| Station  | Elevation (m) | Aspect | Slope |
|----------|---------------|--------|-------|
| Imesker  | 1422          | 315    | 16    |
| Armed    | 1969          | 331    | 11    |
| Tachdert | 2346          | 184    | 16    |
| Caf      | 2640          | 150    | 15    |
| Neltner  | 3122          | 20     | 9     |
| OukaSM   | 3226          | 131    | 3     |

---

**Table 1:** Topographic characteristics of available meteorological stations.

**Tableau 1:** Caractéristiques topographiques des stations météorologiques.

| <b>Band</b> | <b>Spectral band</b> | <b>Bandwidth (<math>\mu\text{m}</math>)</b> | <b>Nominal nadir resolution (m)</b> |
|-------------|----------------------|---------------------------------------------|-------------------------------------|
| 1           | Blue                 | 0.45-0.52                                   | 30                                  |
| 2           | Green                | 0.53-0.61                                   | 30                                  |
| 3           | Red                  | 0.62-0.69                                   | 30                                  |
| 4           | Near IR              | 0.78-0.91                                   | 30                                  |
| 5           | Mid IR               | 1.57-1.78                                   | 30                                  |
| 6           | Thermal              | 10.4-12.6                                   | 60                                  |
| 7           | Mid IR               | 2.10-2.35                                   | 30                                  |

**Table 2:** Main characteristics of ETM+ images used in this study.

**Tableau 2:** Principales caractéristiques des images ETM+utilisées dans cette étude.

| Date             | Sun<br>Azimuth | Sun<br>Elevation |
|------------------|----------------|------------------|
| 07 November 2002 | 176            | 42               |
| 25 December 2002 | 172            | 35               |
| 26 January 2003  | 167            | 39               |
| 11 February 2003 | 166            | 44               |
| 27 February 2003 | 164            | 49               |
| 18 May 2003      | 153            | 77               |

**Table 3:** List of ETM+ images and sun location at the time of acquisition<sup>1</sup>.

**Tableau 3:** Liste des images ETM+ et la localisation du soleil au temps d'acquisition<sup>1</sup>.

<sup>1</sup>The Solar Position Algorithm ([Reda and Andreas, 2003](#)) was used to calculate sun position angle.

| <b>Band</b> | <b>Spectral band</b> | <b>Bandwidth (<math>\mu\text{m}</math>)</b> | <b>Nominal nadir resolution (m)</b> |
|-------------|----------------------|---------------------------------------------|-------------------------------------|
| 1           | Red                  | 0.62-0.67                                   | 250                                 |
| 2           | Near IR              | 0.84-0.87                                   | 250                                 |
| 3           | Blue                 | 0.45-0.47                                   | 500                                 |
| 4           | Green                | 0.54-0.56                                   | 500                                 |
| 5           | Infrared             | 1.23-1.25                                   | 500                                 |
| 6           | Infrared             | 1.62-1.65                                   | 500                                 |
| 7           | Infrared             | 2.10-2.15                                   | 500                                 |

**Table 4:** Main characteristics of MODIS images used in this study.

**Tableau 4 :** Principales caractéristiques des images MODIS utilisées dans cette étude.

| Period of acquisition | Stations | LRM   |      |       | MSPAT |      |       |
|-----------------------|----------|-------|------|-------|-------|------|-------|
|                       |          | $R^2$ | RMSE | BIAS  | $R^2$ | RMSE | BIAS  |
| 2003/2004             | Armed    | 1.00  | 0.00 | 0.00  | 1.00  | 0.00 | 0.00  |
|                       | Caf      | 0.56  | 3.14 | -0.31 | 0.56  | 3.12 | -0.10 |
|                       | OukaSM   | 0.77  | 2.51 | 0.00  | 0.77  | 2.51 | 0.00  |
| 2004/2005             | Armed    | 1.00  | 0.00 | 0.00  | 1.00  | 0.00 | 0.00  |
|                       | Caf      | 0.91  | 2.00 | -0.25 | 0.91  | 1.97 | -0.05 |
|                       | OukaSM   | 0.87  | 2.44 | 0.00  | 0.87  | 2.44 | 0.00  |
| 2005/2006             | Armed    | 1.00  | 0.00 | 0.00  | 1.00  | 0.00 | 0.00  |
|                       | Caf      | 0.85  | 2.23 | -0.50 | 0.86  | 2.18 | -0.26 |
|                       | OukaSM   | 0.76  | 2.90 | 0.00  | 0.76  | 2.90 | 0.00  |
|                       | Imsker   | 0.93  | 1.17 | 0.61  | 0.89  | 1.56 | -1.24 |
| 2007/2008             | Armed    | 1.00  | 0.00 | 0.00  | 1.00  | 0.00 | 0.00  |
|                       | Tachdert | 0.94  | 1.00 | 0.10  | 0.92  | 1.16 | 0.56  |
|                       | Neltner  | 0.40  | 3.05 | 1.05  | 0.35  | 3.07 | -0.31 |
|                       | OukaSM   | 0.74  | 2.27 | 0.00  | 0.74  | 2.27 | 0.00  |

**Table 5:** Statistical simulation of air temperature with MSPAT model and LRM method.

**Tableau 5:** Statistiques des simulations de la température de l'air avec les modèles MSPAT et LRM.

| Season           | Number of images | Pixels | Efficiency          | LRM   | MSPAT |      |
|------------------|------------------|--------|---------------------|-------|-------|------|
| <b>2003/2004</b> | 42               | 117    | RMSE (%)            | 6.84  | 5.20  |      |
|                  |                  |        | BIAS (%)            | -0.17 | -0.21 |      |
|                  |                  |        | Regression Equation | $R^2$ | 0.80  | 0.88 |
|                  |                  |        |                     | $a$   | 0.89  | 0.96 |
|                  |                  |        |                     | $b$   | 0.01  | 0.00 |
| <b>2004/2005</b> | 52               | 117    | RMSE (%)            | 9.66  | 6.08  |      |
|                  |                  |        | BIAS (%)            | -3.35 | -0.42 |      |
|                  |                  |        | Regression Equation | $R^2$ | 0.63  | 0.83 |
|                  |                  |        |                     | $a$   | 1.27  | 0.97 |
|                  |                  |        |                     | $b$   | 0.03  | 0.01 |
| <b>2005/2006</b> | 82               | 117    | RMSE (%)            | 8.07  | 7.60  |      |
|                  |                  |        | BIAS (%)            | -2.28 | 0.11  |      |
|                  |                  |        | Regression Equation | $R^2$ | 0.75  | 0.78 |
|                  |                  |        |                     | $a$   | 1.08  | 0.93 |
|                  |                  |        |                     | $b$   | 0.02  | 0.00 |

**Table 6:** Performance in snow cover area estimating using LRM and MSPAT models.

**Tableau 6:** Performance de l'estimation des surfaces d'enneigement en utilisant les modèles LRM et MSPAT.
